# Supplementary material
Source: PubMed Central journal article supplement (PMC3320935)
Supplement: supp_M111.336511_jbc.M111.336511-1.pdf [file supp_M111.336511_jbc.M111.336511-1.pdf]

Supplemental Material to:

The Kv7.2/Kv7.3 heterotetramer assembles with a random subunit arrangement

Andrew P. Stewart, Juan Camilo Gómez-Posada, Jessica McGeorge, Maral J. Rouhani, Alvaro Villarroel, Ruth D. Murrell-Lagnado, and J. Michael Edwardson

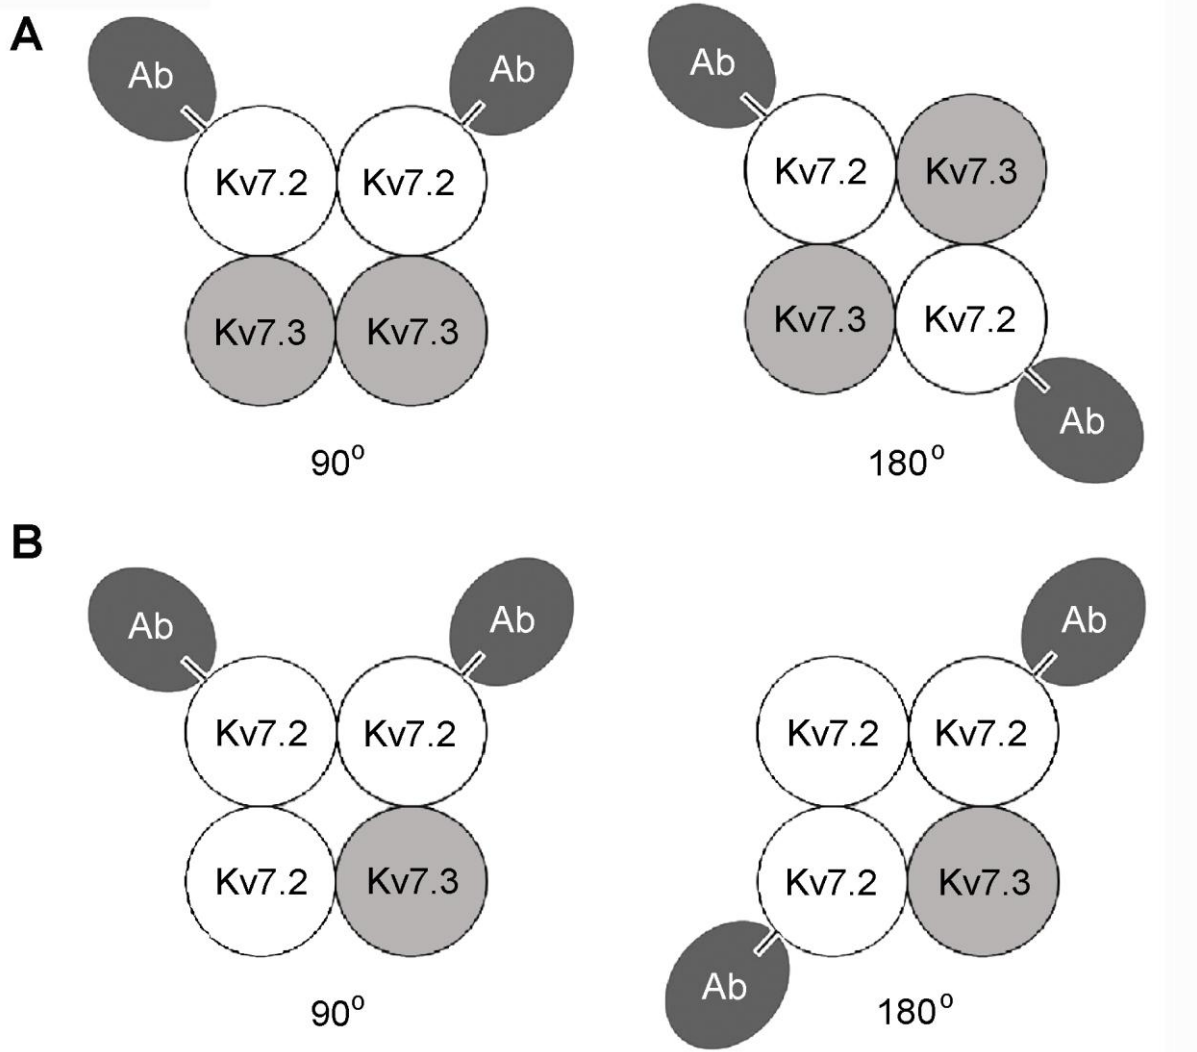

**Fig. S1.** Possible subunit arrangements in the Kv7.2/Kv7.3 heterotetramer. In (A) the channel has a 2:2 subunit stoichiometry but a variable subunit arrangement. In (B) the channel has a stoichiometry of 3:1, Kv7.2:Kv7.3.
